# Supplementary material for: Insights in the Recalcitrance of Theasinensin A to Human Gut Microbial Degradation
Source: PubMed Central journal article supplement — J Agric Food Chem. 2021 Feb 23;69(8):2477–84. doi: 10.1021/acs.jafc.1c00727 (PMC8028050; doi:10.1021/acs.jafc.1c00727), 2021-02-23
Supplement: jf1c00727_si_001.pdf [file jf1c00727_si_001.pdf]

**Supporting information** with “Insights in the recalcitrance of theasinensin A to human gut microbial degradation” by Liu, de Bruijn, Sanders, Wang, Bruins, and Vincken.

**Table S1.** Theasinensin A (TSA) and Theaflavin-3,3'-digallate (TFDG) Contents in 15 Black Tea Samples and 6 Oolong Tea Samples.

| Black tea |                                               |                         |                          | Oolong tea |                            |                         |                          |
|-----------|-----------------------------------------------|-------------------------|--------------------------|------------|----------------------------|-------------------------|--------------------------|
| NO.       | Name & source                                 | TSA (mg/g) <sup>a</sup> | TFDG (mg/g) <sup>b</sup> | NO.        | Name & source              | TSA (mg/g) <sup>a</sup> | TFDG (mg/g) <sup>b</sup> |
| 1         | Jinjunmei, Fujian, China                      | 6.30                    | 2.56                     | 1          | Tieguanyin, Fujian, China  | 0.71                    | 0.27                     |
| 2         | Lapsang souchong, Fujian, China               | 7.07                    | 3.08                     | 2          | Baijiguan, Fujian, China   | 2.20                    | 0.90                     |
| 3         | Dianhong, Yunnan, China                       | 6.49                    | 1.53                     | 3          | Bantianyao, Fujian, China  | 1.91                    | 0.44                     |
| 4         | Qimen, Anhui, China                           | 2.20                    | 0.52                     | 4          | Shuijinggui, Fujian, China | 2.24                    | 0.79                     |
| 5         | Black tea, Guangxi, China <sup>c</sup>        | 2.38                    | 0.68                     | 5          | Rougui, Fujian, China      | 3.41                    | 0.65                     |
| 6         | Black tea, Fujian, China <sup>c</sup>         | 6.78                    | 3.03                     | 6          | Tieluohan, Fujian, China   | 3.03                    | 1.17                     |
| 7         | Zhenda, Fujian, China                         | 1.05                    | 0.95                     |            | <b>Average</b>             | <b>2.25</b>             | <b>0.70</b>              |
| 8         | Fuyun, Fujian, China                          | 2.79                    | 0.97                     |            |                            |                         |                          |
| 9         | Wuyi, Fujian, China                           | 1.30                    | 2.20                     |            |                            |                         |                          |
| 10        | Minbei, Fujian, China                         | 1.21                    | 1.17                     |            |                            |                         |                          |
| 11        | Black tea, Kenya <sup>c</sup>                 | 1.66                    | 1.84                     |            |                            |                         |                          |
| 12        | Black tea, Indonesia <sup>c</sup>             | 1.59                    | 1.98                     |            |                            |                         |                          |
| 13        | Black tea, Sri Lanka <sup>c</sup>             | 6.64                    | 3.03                     |            |                            |                         |                          |
| 14        | Black tea, India <sup>c</sup>                 | 5.44                    | 3.55                     |            |                            |                         |                          |
| 15        | Lipton black tea, Wageningen, The Netherlands | 2.72                    | 1.54                     |            |                            |                         |                          |
|           | <b>Average</b>                                | <b>3.71</b>             | <b>1.91</b>              |            |                            |                         |                          |

<sup>a</sup> TSA content was expressed as mg per g dry weight of tea leaves, quantified using an external calibration curve of the purified TSA.

<sup>b</sup> TFDG content was expressed as mg per g dry weight of tea leaves, quantified using an external calibration curve of the TFDG standard.

<sup>c</sup> Brand names are unknown.

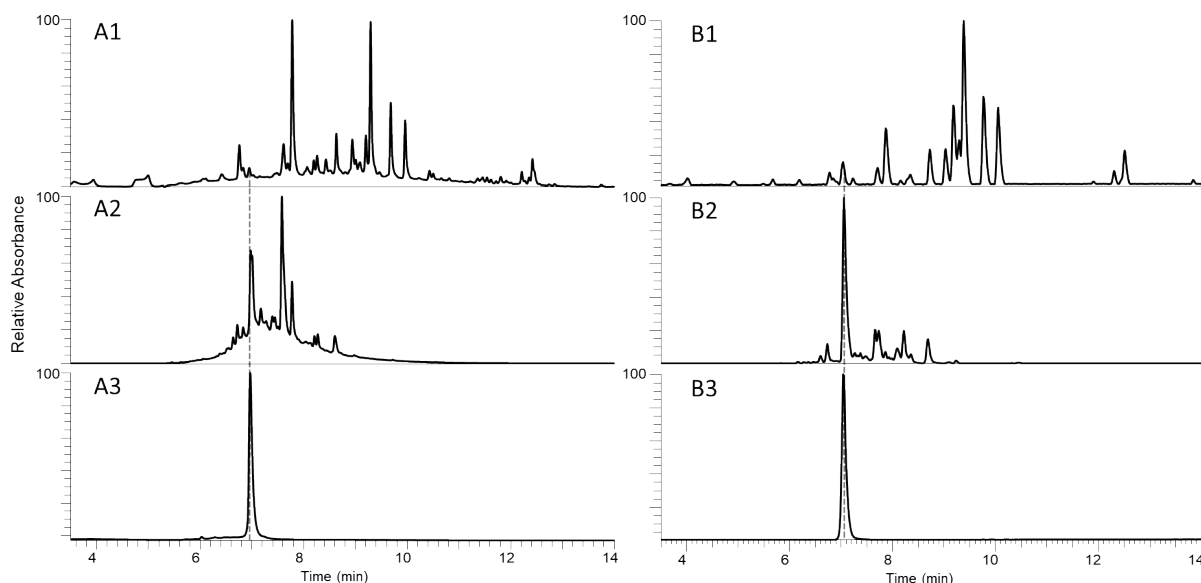

**Figure S1.** UHPLC-UV<sub>280 nm</sub> (A1–A3) and UHPLC-MS base peak (B1–B3, negative ionization mode) chromatograms of decaffeinated black tea extract NO. 2 (A1, B1), pre-purified TSA after Flash chromatography (A2, B2), and TSA purified by preparative RP-HPLC (A3, B3).

**The methods used for flash chromatography and preparative RP-HPLC are as follows:**

The decaffeinated black tea extract was pre-purified using a Reveleris flash chromatography system (Grace, Columbia, USA). The sample was separated on a C18 column (40  $\mu\text{m}$ , 40 g; Reveleris; Grace, Columbia, USA). Mobile phases consisting of 0.1% (v/v) formic acid in water (A) and 0.1% (v/v) formic acid in methanol (B) were used to elute the column at a flow rate of 40 mL/min. The elution program was set as follows: 0–4.5 min, isocratic on 10% (v/v) B; 4.5–14.5 min, linear gradient from 10% to 20% (v/v) B; 14.5–16 min, linear gradient from 20% to 50% v/v B; 16–21 min, linear gradient from 50% to 95% (v/v) B; 21–22.5 min, isocratic on 95% (v/v) B; 22.5–25.5 linear gradient from 95% to 10% (v/v) B; 25.5–28 min isocratic on 10% (v/v) B. The collected fractions were analysed by UHPLC-ESI-IT-MS (Thermo Fischer Scientific, San Jose, CA, USA) and those containing TSA were pooled. The organic solvent was evaporated under reduced pressure at 45 °C, and water was then removed by lyophilisation. Next, a Waters preparative RP-HPLC system (Waters, Milford, MA, USA) was used for the further purification of the pools obtained from Flash chromatography. The pools were solubilised at 50 mg/mL in a methanol/water (17:83, v/v) solution and injected (2.0–2.5 mL) on a Waters XBridge Prep C18 OBD column (19 $\times$ 250 mm, 5  $\mu\text{m}$ ). Mobile phase A was 0.1% (v/v)

**Supporting information** with “Insights in the recalcitrance of theasinensin A to human gut microbial degradation” by Liu, de Bruijn, Sanders, Wang, Bruins, and Vincken.

---

formic acid in water and mobile phase B was 0.1% (v/v) formic acid in methanol were used to elute the column at a flow rate of 17 mL/min at room temperature. The elution program was as follows: 0–2.17 min, isocratic on 5% (v/v) B; 2.17–72.17 min, linear gradient from 5% to 15% (v/v) B; 72.17–75.67 min, linear gradient from 15% to 99 % (v/v) B; 75.67–93.17 min, isocratic on 99% (v/v) B; 93.17-96.67 min, linear gradient from 99% to 5% (v/v) B; 96.67-114.17 min isocratic on 5% (v/v) B. Data was acquired and analysed with MassLynx (version 4.1, Waters). The collected fractions were analysed by UHPLC-ESI-IT-MS and those containing TSA were pooled. The organic solvent was evaporated under reduced pressure at 45 °C, and water was removed by lyophilisation.

**Supporting information** with “Insights in the recalcitrance of theasinensin A to human gut microbial degradation” by Liu, de Bruijn, Sanders, Wang, Bruins, and Vincken.

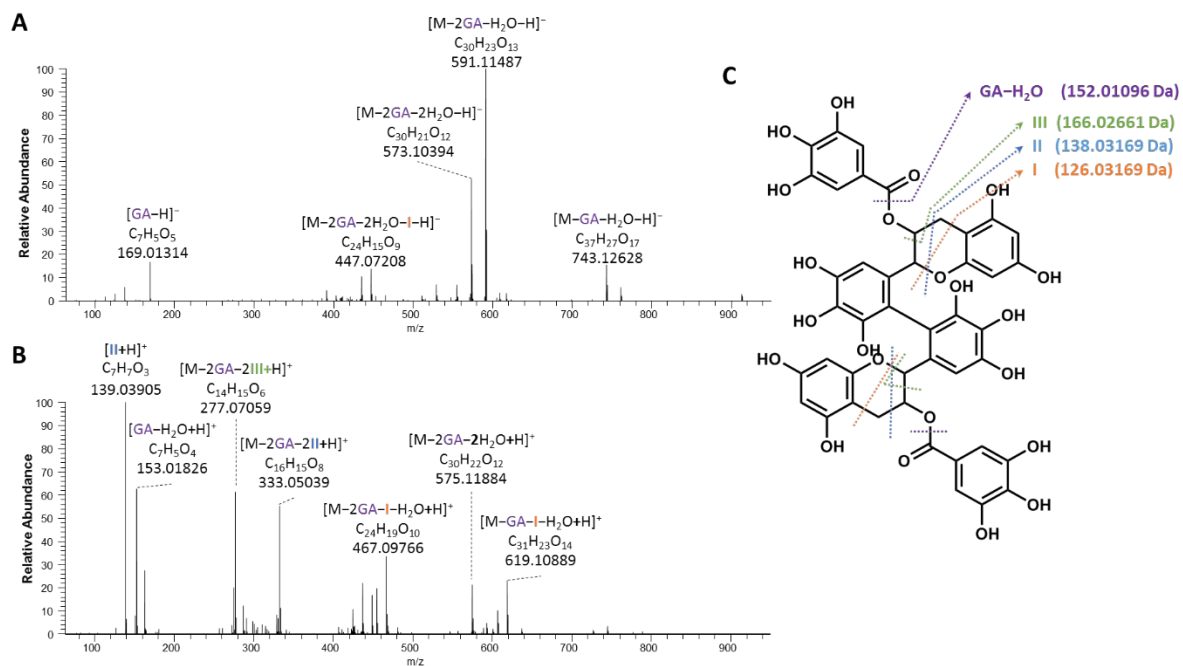

**Figure S2.** High resolution HCD fragmentation spectrum (NCE=35) of purified TSA in negative (A) and positive (B) ionization mode obtained from UHPLC-Q-Orbitrap-MS. The characteristic peaks are labelled with their corresponding fragmentation pathways (C).

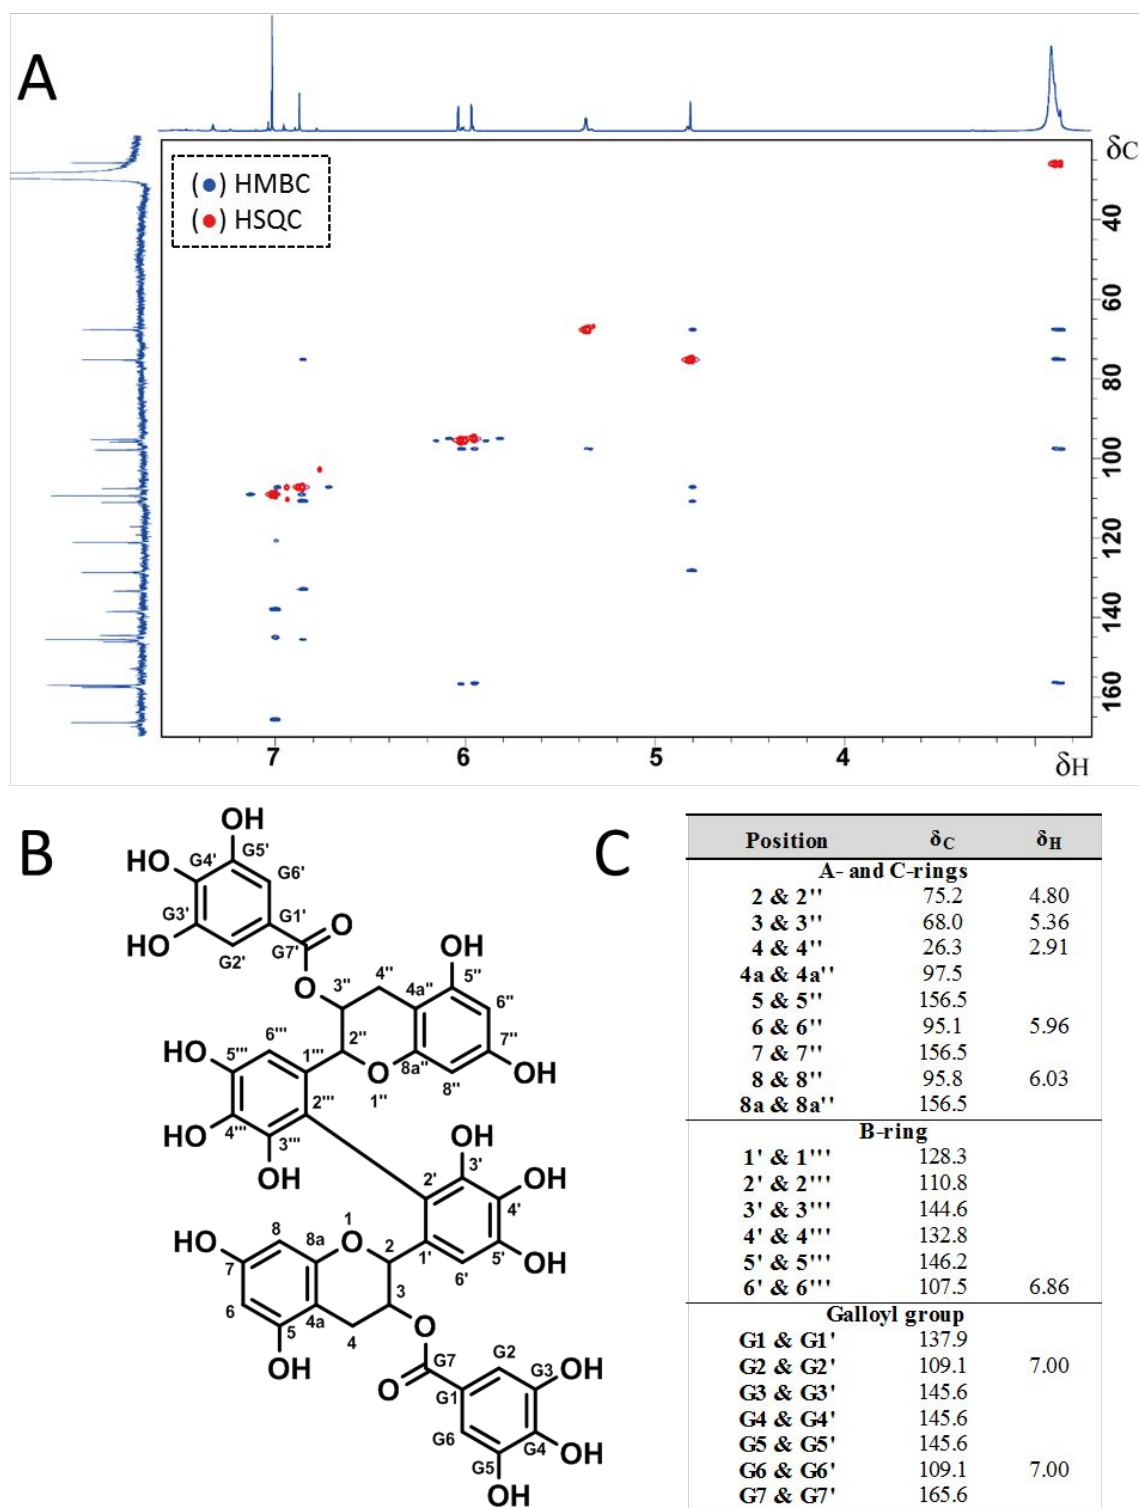

**Figure S3.** NMR analysis of TSA in acetone- $d_6$  was performed on a Bruker Avance III 600 MHz spectrometer equipped with a cryogenic probe (Bruker BioSpin, Rheinstetten, Germany). Recorded 1D  $^1\text{H}$  and  $^{13}\text{C}$ , and 2D HSQC (red) and HMBC (blue) spectra (A), chemical structure of TSA (B), and NMR spectroscopic data for TSA ( $\delta$  in ppm) (C).

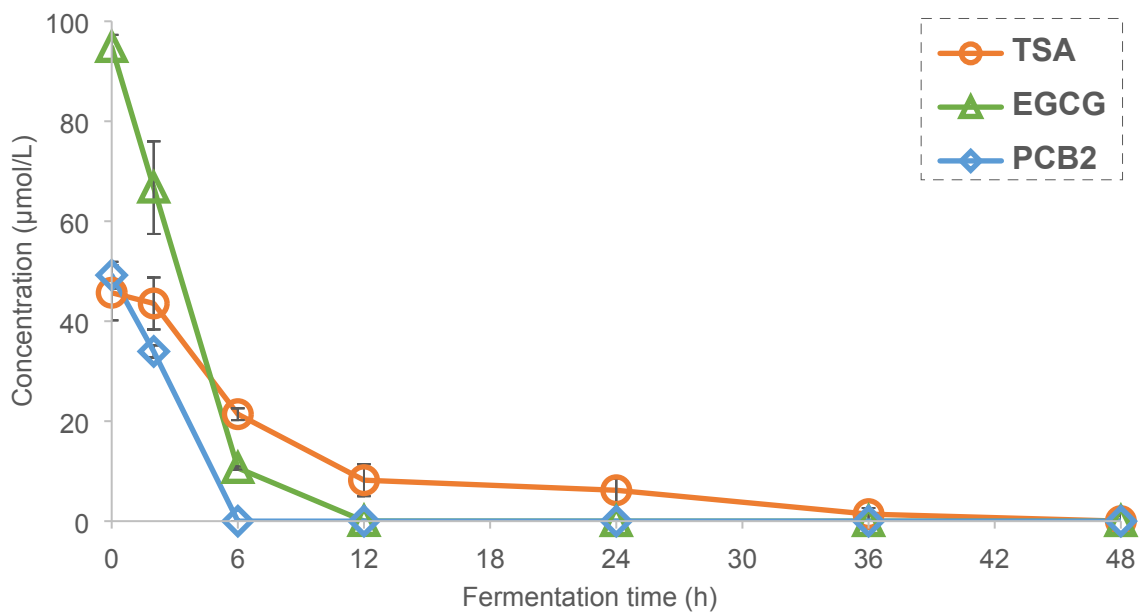

**Figure S4.** Changes in the concentrations of TSA, EGCG, and PCB2 during the fermentation. Error bars show standard deviation of three biological replicates.

**Supporting information** with “Insights in the recalcitrance of theasinensin A to human gut microbial degradation” by Liu, de Bruijn, Sanders, Wang, Bruins, and Vincken.

**Table S2.** Mass Spectrometric Data of Metabolites of TSA, EGCG, and PCB2 Tentatively Identified by UHPLC-Q-Orbitrap-MS.

| id  | Tentative identification                                                                                                              | [M-H] <sup>-</sup><br>(m/z) | MS <sup>2</sup> <sup>a</sup>                                        |
|-----|---------------------------------------------------------------------------------------------------------------------------------------|-----------------------------|---------------------------------------------------------------------|
| M01 | Theasinensin B                                                                                                                        | 761.13617                   | 591.11475; 609.12634; 453.08325;<br>169.01302; 327.05096; 339.05133 |
| M02 | Theasinensin C                                                                                                                        | 609.12500                   | 471.09274; 167.03378; 303.05090;<br>453.08359; 333.06113            |
| M03 | Theasinensin E                                                                                                                        | 609.12506                   | 471.09274; 167.03378; 303.05090;<br>453.08359; 333.06113            |
| M04 | Epigallocatechin                                                                                                                      | 305.06680                   | 125.02302; 137.02312; 146.95995;<br>167.03407; 219.06551            |
| M05 | Epicatechin                                                                                                                           | 289.07181                   | 109.02795; 123.04369; 125.02293;<br>151.03882; 97.02792             |
| M06 | 1-(3',4',5'-Trihydroxyphenyl)-3-(2'',4'',6''-trihydroxyphenyl)-propan-2-yl gallate                                                    | 459.09369                   | 267.09863; 129.10191; 169.01317;<br>223.10832; 307.08218            |
| M07 | 1-(3',4',5'-Trihydroxyphenyl)-3-(2'',4'',6''-trihydroxyphenyl)-propan-2-ol                                                            | 307.08252                   | 139.03874; 214.92589; 151.03882;<br>167.03387; 125.02300            |
| M08 | 1-(3',4'-Dihydroxyphenyl)-3-(2'',4'',6''-trihydroxyphenyl)-propan-2-ol                                                                | 291.08762                   | 123.04369; 135.04385; 167.03362                                     |
| M09 | 2-(3-(3,4-Dihydroxyphenyl)-2-hydroxy-1-(2,4,6-trihydroxyphenyl)propyl)-4-(3-(3,4-dihydroxyphenyl)-2-hydroxypropyl)benzene-1,3,5-triol | 581.16687                   | 291.08759; 125.02300; 167.03386;<br>333.09814; 455.13519            |
| M10 | 2-(3,4-Dihydroxyphenyl)-8-(3-(3,4-dihydroxyphenyl)-2-hydroxy-1-(2,4,6-trihydroxyphenyl)propyl)chromane-3,5,7-triol                    | 579.15143                   | 291.08759; 409.09299; 125.02302                                     |
| M11 | 2-(3-(3,4-dihydroxyphenyl)-2-hydroxy-1-(2,4,6-trihydroxyphenyl)propyl)-4-(2-hydroxy-3-(3-hydroxyphenyl)propyl)benzene-1,3,5-triol     | 563.15564                   | n.d.                                                                |
| M12 | 5-(3',4',5'-Trihydroxyphenyl)-γ-valerolactone                                                                                         | 223.06055                   | 91.05374;<br>171.78961;133.06442;122.70895                          |
| M13 | 5-(3',4'-Dihydroxyphenyl)-γ-valerolactone                                                                                             | 207.06607                   | 75.00163; 87.92365; 103.91849;<br>118.99162; 147.04387              |
| M14 | 5-(4'-Hydroxyphenyl)-γ-valerolactone                                                                                                  | 191.07103                   | n.d.                                                                |
| M15 | 4-Hydroxy-5-(3',4',5'-trihydroxyphenyl)-valeric acid                                                                                  | 241.07146                   | 124.02633; 111.01853; 169.09735;<br>129.10194; 153.10263            |
| M16 | 4-Hydroxy-5-(3',4'-dihydroxyphenyl)-valeric acid                                                                                      | 225.07631                   | 123.04369; 163.07510; 135.04396                                     |
| M17 | 5-(3',4',5'-Trihydroxyphenyl)-valeric acid                                                                                            | 225.07632                   | 81.03294; 123.04369; 101.02281                                      |
| M18 | 5-(3',5'-Dihydroxyphenyl)-valeric acid                                                                                                | 209.08165                   | n.d.                                                                |
| M19 | 5-(3',4'-Dihydroxyphenyl)-valeric acid                                                                                                | 209.08164                   | 123.08006; 81.03296; 107.04872;<br>91.05378; 149.05963              |
| M20 | 5-(4'-Hydroxyphenyl)-valeric acid                                                                                                     | 193.08691                   | 121.02799; 90.92209; 175.07524;<br>147.08031; 106.04085             |

**Supporting information** with “Insights in the recalcitrance of theasinensin A to human gut microbial degradation” by Liu, de Bruijn, Sanders, Wang, Bruins, and Vincken.

---

|     |                                          |           |                                                      |
|-----|------------------------------------------|-----------|------------------------------------------------------|
| M21 | 3-(3',5'-Dihydroxyphenyl)-propionic acid | 181.05032 | 92.99213; 136.98221; 123.03127                       |
| M22 | 3-(3',4'-Dihydroxyphenyl)-propionic acid | 181.05040 | 92.99213; 136.98221; 123.03127                       |
| M23 | 3-(3'-Hydroxyphenyl)-propionic acid      | 165.05543 | 119.04870; 121.02797; 106.04082;<br>92.02517         |
| M24 | Gallic acid                              | 169.01403 | 69.03293; 125.02317; 97.02796;<br>79.01718           |
| M25 | 4-Hydroxybenzoic acid                    | 137.02398 | 93.03298; 65.03806; 125.88489                        |
| M26 | Pyrogallol                               | 125.02412 | 69.03297; 67.01733; 124.01511;<br>97.02785; 79.01739 |

---

<sup>a</sup> MS<sup>2</sup> data are sorted in order of relative intensity; n.d., not detected.



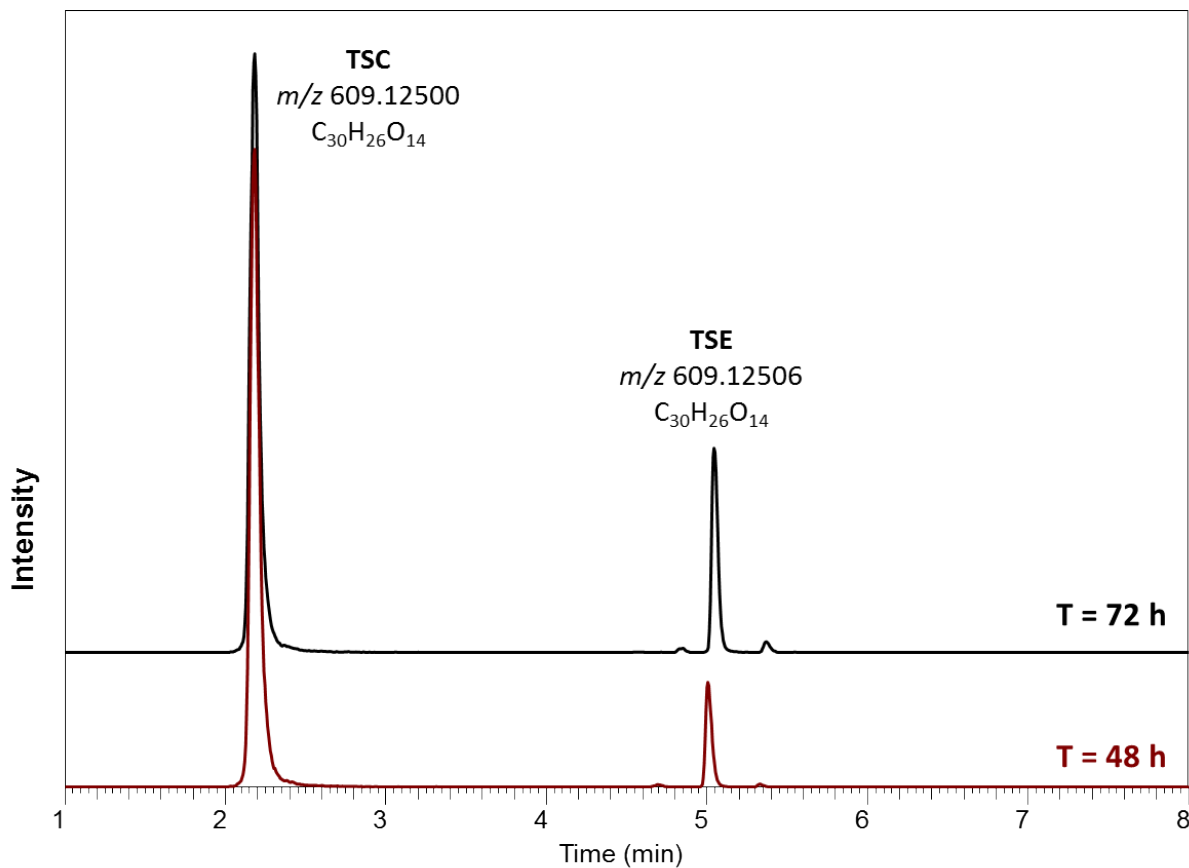

**Figure S5.** Extracted ion chromatograms of TSC ( $m/z$  609.12500) and TSE ( $m/z$  609.12506) in negative ion mode UHPLC-Q-Orbitrap-MS of TSA fermentation samples at fermentation times of 48 and 72 h.

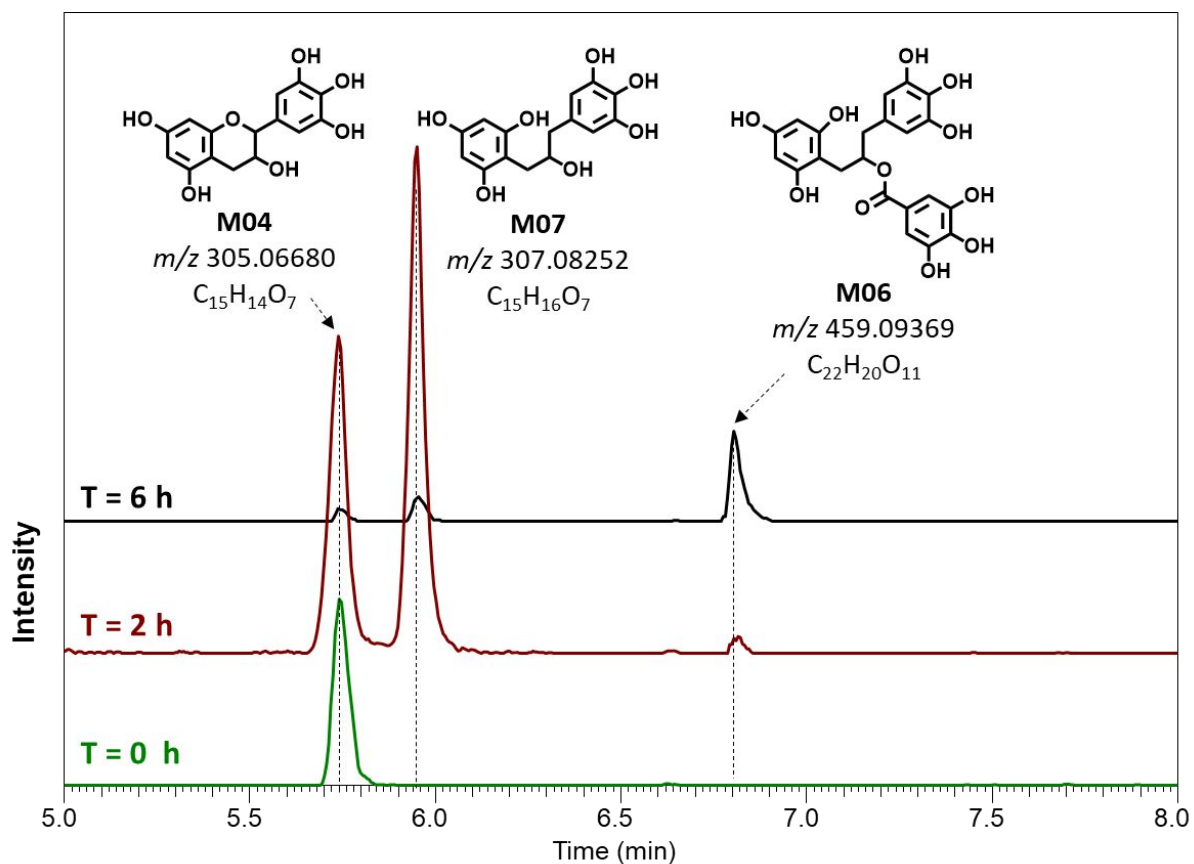

**Figure S6.** Extracted ion chromatograms of M04 ( $m/z$  305.06680), M06 ( $m/z$  459.09369), and M07 ( $m/z$  307.08252) in negative ion mode UHPLC-Q-Orbitrap-MS of EGCG fermentation samples at fermentation times 0, 2, and 6 h.

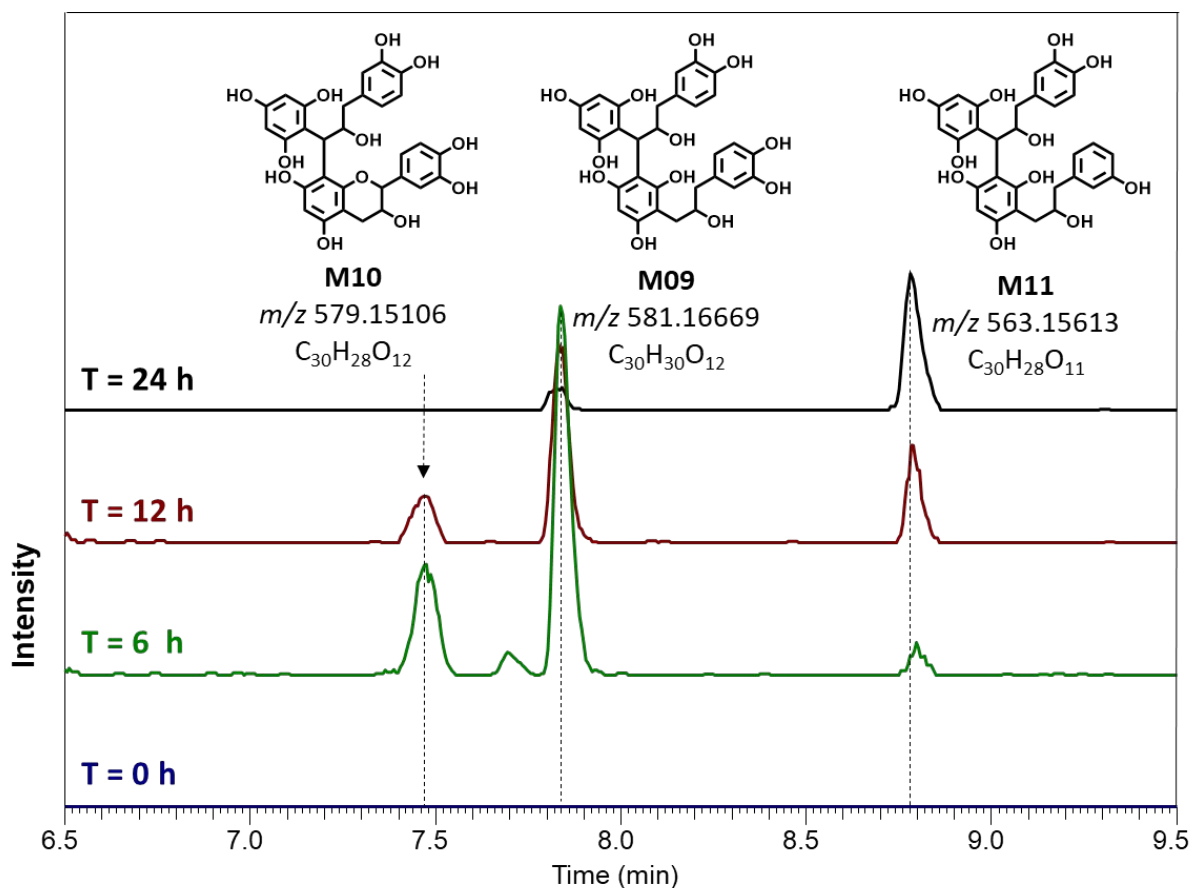

**Figure S7.** Extracted ion chromatograms of M09 ( $m/z$  581.16669), M10 ( $m/z$  579.15106), and M11 ( $m/z$  563.15613) in negative ion mode UHPLC-Q-Orbitrap-MS of PCB2 fermentation samples at fermentation times 0, 6, 12, and 24 h. Note that for M10 and M11 just one possible positional isomer, with regards to C-ring opening and dehydroxylation, respectively, is shown.

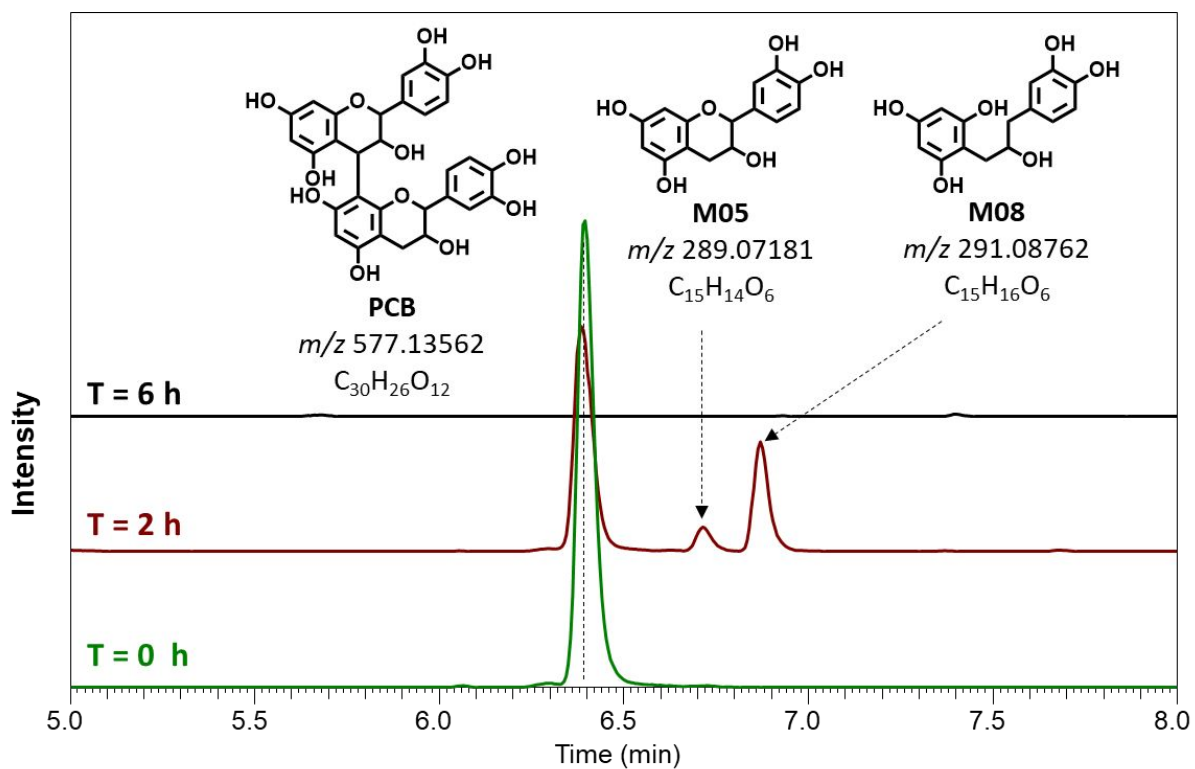

**Figure S8.** Extracted ion chromatograms of PCB2 ( $m/z$  577.13562), M05 ( $m/z$  289.07181), and M08 ( $m/z$  291.08762) in negative ion mode UHPLC-Q-Orbitrap-MS of PCB2 fermentation samples at fermentation times 0, 2, and 6 h.

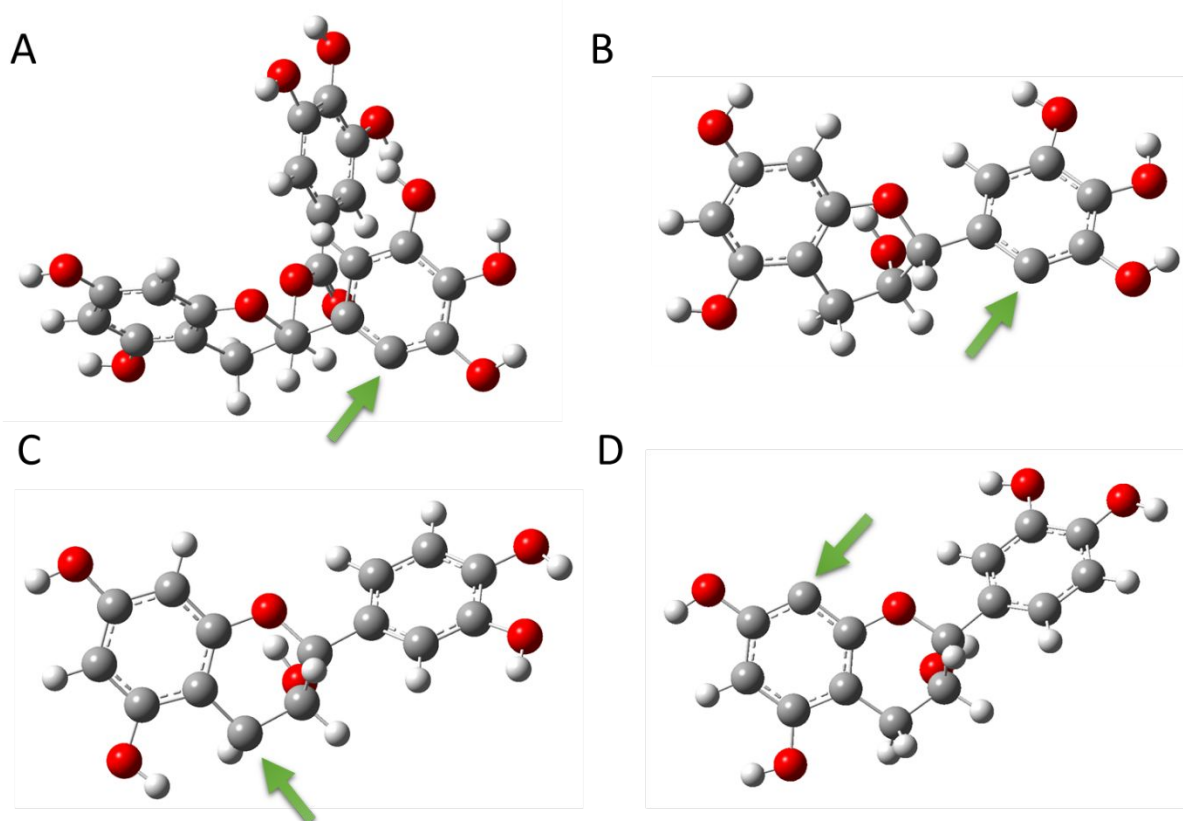

**Figure S9.** Optimized geometries of the interflavanic bond homolytically fissioned radicals of TSA (A), TSC (B), and PCB2 (C, upper unit; D, lower unit). The radical atoms are indicated with arrows.
